# Supplementary figures and images for: Neurospora chromosomes are organized by blocks of importin alpha-dependent heterochromatin that are largely independent of H3K9me3
Source: HighWire-hosted journal article supplement (doi:10.1101/gr.203182.115), 2016-06-03

Calculate observed - expected maps

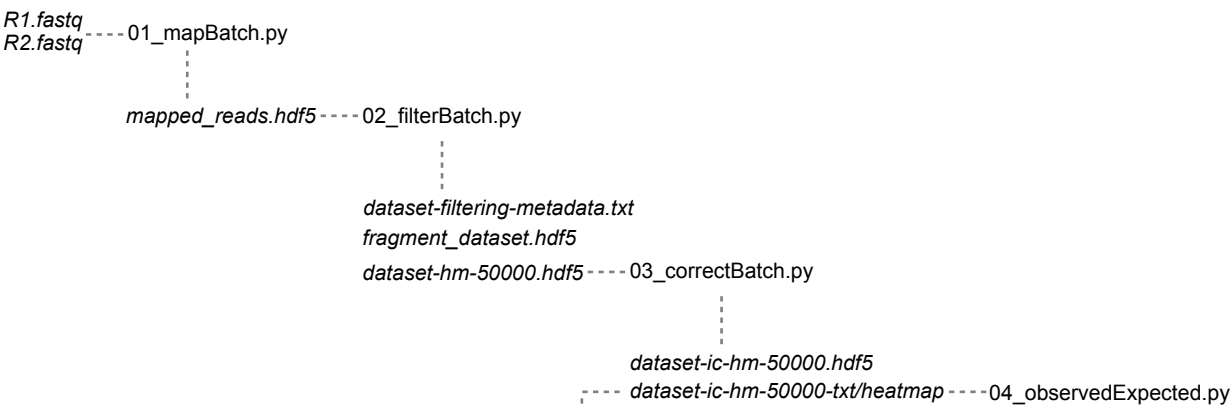

Compare datasets

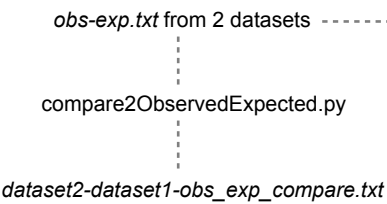

Polymer modeling

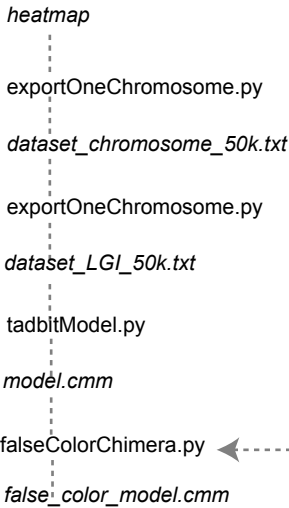

Make Circos

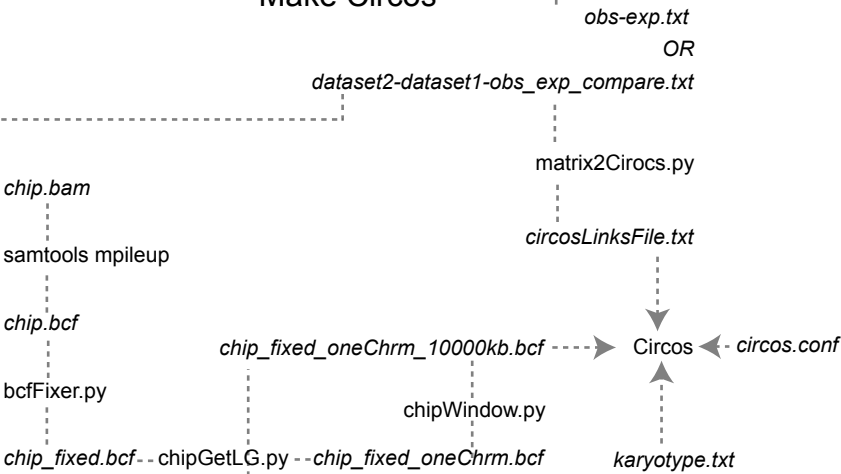

Supplement: Supplemental_Scripts.zip [file Generic_pipeline_overview.pdf › Supplemental_Scripts/Galazka_HiC_python_scripts/Generic_pipeline_overview.pdf]
